# Supplementary material for: Simultaneous determination of ascorbic acid, uric acid and dopamine using silver nanoparticles and copper monoamino-phthalocyanine functionalised acrylate polymer
Source: Royal Society of Chemistry journal article supplement (doi:10.1039/d0ay01183e), 2020-01-01
Supplement: d0ay01183e1.pdf [file d0ay01183e1.pdf]

ARTICLE

# Simultaneous determination of ascorbic acid, uric acid and dopamine using silver nanoparticles and copper monoamino-phthalocyanine functionalised acrylate polymer

Received 00th January 20xx,  
Accepted 00th January 20xx

DOI: 10.1039/x0xx00000x

## Supporting Information

Zina Fredj<sup>a,b</sup>, Mounir Ben Ali<sup>a,b</sup>, Mohammed Nooredeen Abbas<sup>c</sup>, Eithne Dempsey<sup>\*d</sup>

### 1. Electrochemical characterisation of modified electrodes

Cyclic voltammetry was used to examine uric and ascorbic acid signals (1  $\mu\text{M}$  in 0.1 M PBS) at bare, Ag NPs and Cu-MAPA modified glassy carbon electrodes (SI Figures 1 and 2).

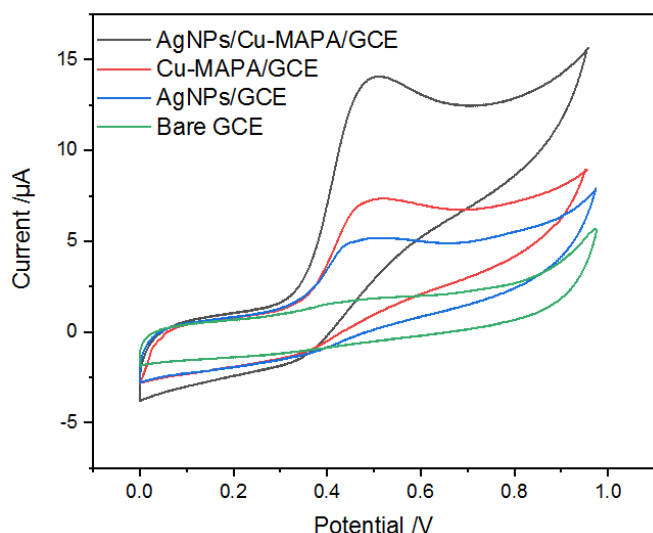

Fig 1. CVs of 1  $\mu\text{M}$  uric acid prepared in 0.1 M PB (pH 7.4) at bare and modified electrodes GCE, GCE/AgNP, GCE/Cu-MAPA and GCE/Cu-MAPA/AgNP (100  $\text{mV s}^{-1}$ ).

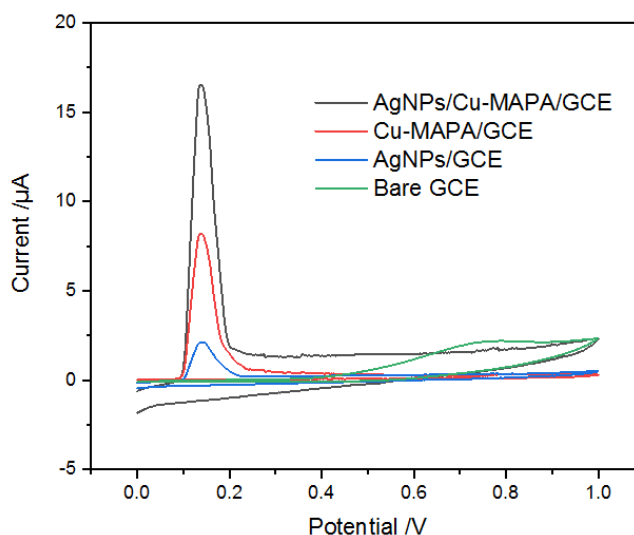

Fig 2. CVs of 1  $\mu\text{M}$  ascorbic acid prepared in 0.1 M PB (pH 7.4) at bare and modified electrodes GCE, GCE/AgNP, GCE/Cu-MAPA and GCE/Cu-MAPA/AgNP (100  $\text{mV s}^{-1}$ ).

### 2. pH and scan rate effect

The peak current of dopamine increased with decreasing pH which was constant from pH 3-6. As pH 7 is considered as physiological pH, it was selected going forward as the working pH for all measurements.

<sup>a</sup> University of Sousse, Higher Institute of Applied Sciences and Technology of Sousse, GREENS-ISSAT, 4003 IbnKhaldoun Sousse, Tunisia

<sup>b</sup> NANOMISENE Lab, LR16CRMN01, Centre for Research on Microelectronics and Nanotechnology of Sousse, Technopole of Sousse, Sahloul, 4034, Sousse, Tunisia

<sup>c</sup> Electroanalytical Laboratory, National Research Centre, Cairo, Egypt

<sup>d</sup> Department of Chemistry, Maynooth University, Maynooth, Co. Kildare, Ireland.

† Supplementary information available should be included here]. See DOI:

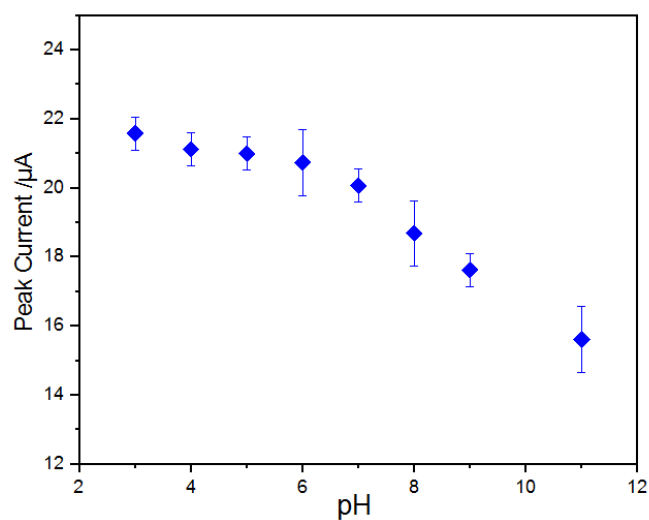

Fig 3. Response to 1  $\mu\text{M}$  dopamine in different pH solutions (pH 3 to 11), at a scan rate of 100  $\text{mV s}^{-1}$ .

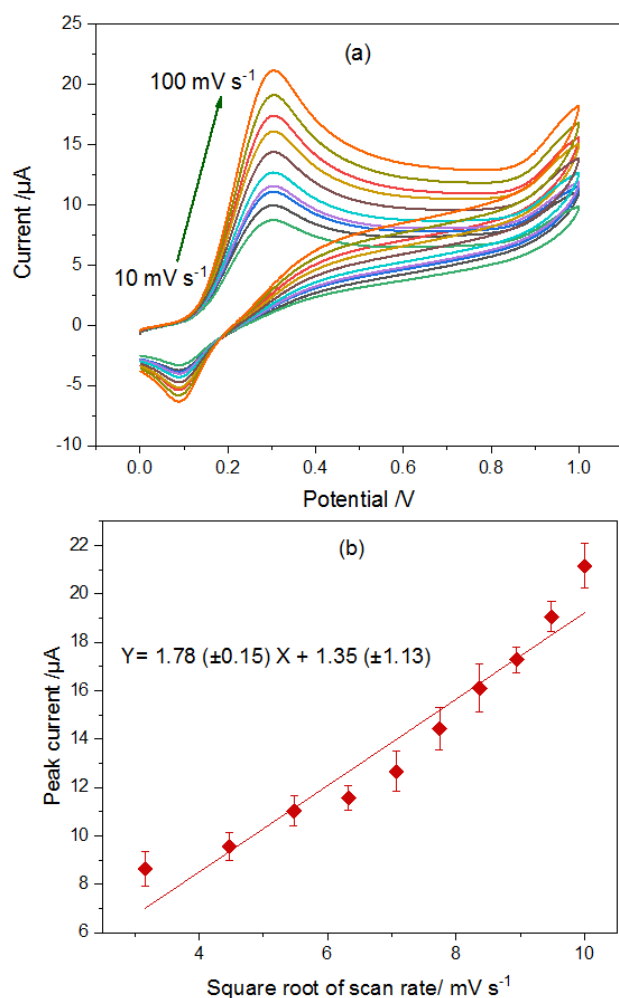

Fig 4. a) Cyclic voltammogram response of 1  $\mu\text{M}$  dopamine at GCE/Cu-MAPA/AgNP at different scan rates from 10 to 100  $\text{mV s}^{-1}$ . b) Square root of scan rate vs. peak current.

The anodic peak current of dopamine increased upon increasing scan rates from 10 to 100  $\text{mV s}^{-1}$  and the peak currents had a dependence on the square root of scan rates from 10 to 100  $\text{mV s}^{-1}$  with correlation coefficient of 0.9496. This indicated that a predominately diffusion controlled current was evident with the possibility of some adsorptive effects due to non-ideal linearity.

### 3. Reflectance microscopy surface images

Reflectance microscopy was used to visualise the surfaces of AgNP, Cu-MAPA and Cu-MAPA on AgNP which were dropcast on silicon surfaces and visualised in bright field (Figure 4). The Ag NP ranged from large aggregates (20-50  $\mu\text{m}$ ) to smaller <1  $\mu\text{m}$  particles with larger aggregates formed in the presence of Cu MAPA.

(a)

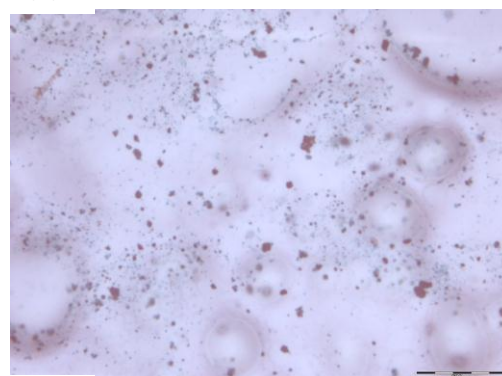

(b)

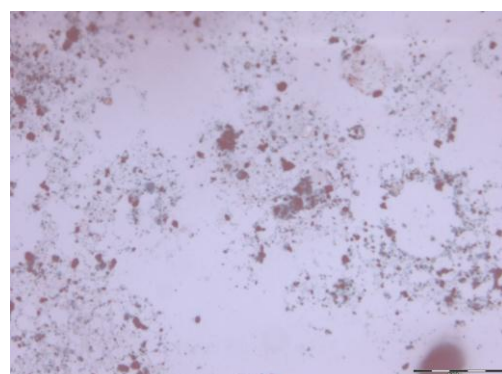

(c)

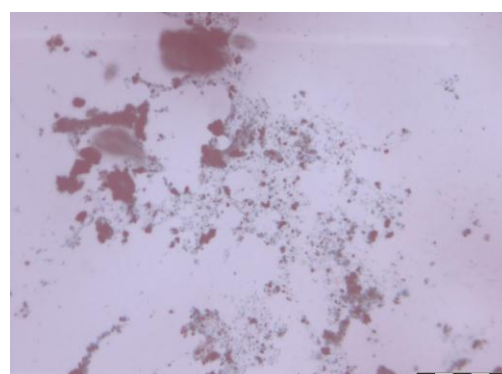

Fig. 5 Reflectance microscopy images on silicon substrates x 20 bright field  
(a) Ag NPs (b) Cu-MAPA (c) Cu-MAPA on AgNPs
